# Supplementary material for: Virulence factors of Shiga toxin-producing Escherichia coli and the risk of developing haemolytic uraemic syndrome in Norway, 1992–2013
Source: PubMed Central journal article supplement (PMC5554284; doi:10.1007/s10096-017-2974-z), 2017-04-08

O1-122 O1-71 O1-57 O1-141 O1-154 O1-43/48 PO113 PO157

*HUS*  
*eae*  
*ehxA*  
*pagC*  
*ent/espl2n*  
*nleB*  
*nleE*  
*efa1/ljfA*  
*nleH1-2*  
*paa*  
*nleG2-3*  
*Z2099*  
*lpf1O157*  
*lpfAO26*  
*lpfZ0157*  
*lpfGO113*  
*fyuA*  
*ureC*  
*iha1*  
*saa*  
*subA*  
*espP*  
*tox8*  
*ecf4*  
*StcE*  
*StcE013*  
*nleC*  
*cdt(II,III,V)*  
*cdt(I,V)*  
*agn43EDL*  
*aarC*  
*astA*  
*cnf*  
*ehaA*  
*eibG*  
*pic*  
*STX:stx1a*  
*STX:stx1c*  
*STX:stx1d*  
*STX:stx2a*  
*STX:stx2b*  
*STX:stx2c*  
*STX:stx2d*  
*STX:stx2g*

- NSFO157
- O103:H2
- O26:H11
- O145:H28
- SFO157
- O117:H7
- O145:H?
- O103:H25
- O111:H8

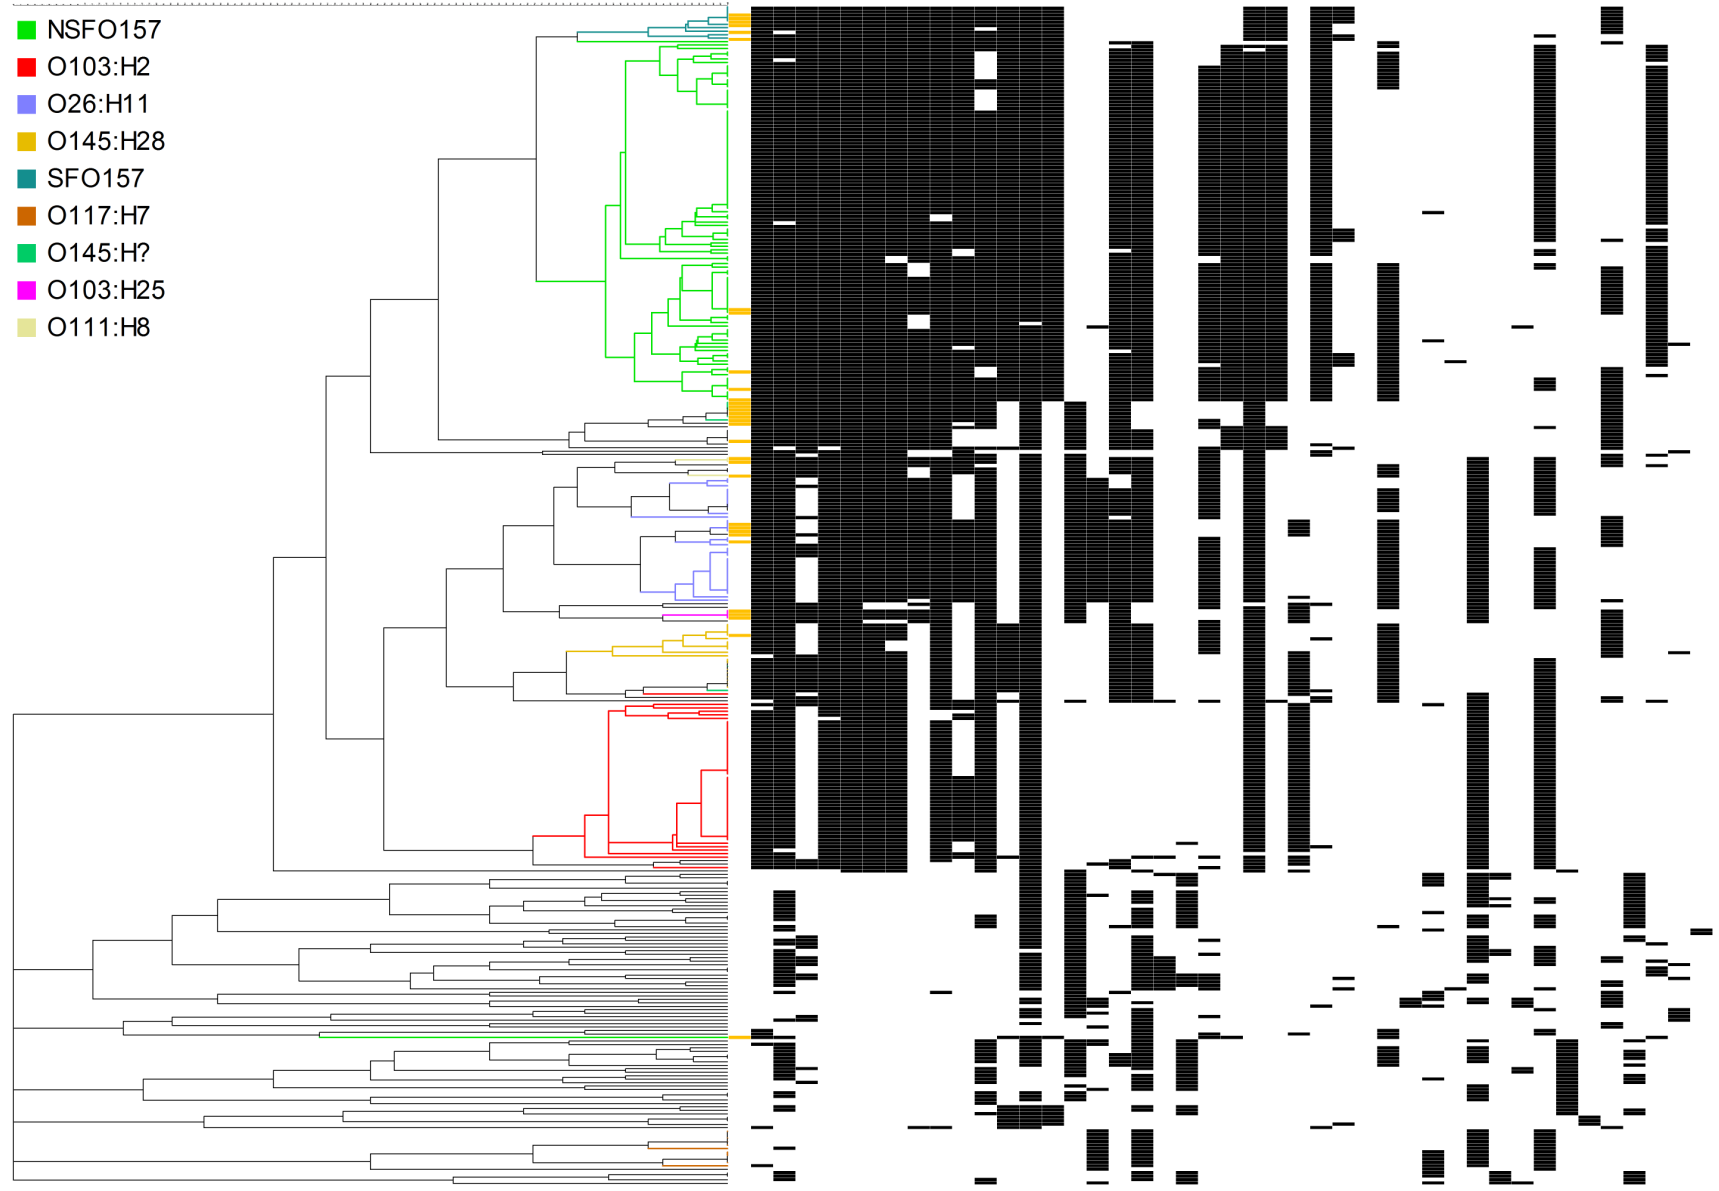

Supplement: 10096_2017_2974_MOESM1_ESM.pdf [file 10096_2017_2974_MOESM1_ESM.pdf]
